# Supplementary material
Source: PubMed Central journal article supplement (PMC8106683)
Supplement: 41392_2021_574_MOESM1_ESM.pdf [file 41392_2021_574_MOESM1_ESM.pdf]

## 24 **Materials and Methods**

### 25 **Cells and Viruses**

26 Human hepatoma cell line (Huh7.0 cells), Vero-E6 cells, Vero cells, the human epithelial cell  
27 line (Caco-2 cells), and human cervical cancer cell line (HeLa cells) were maintained in  
28 Dulbecco's modified Eagle's medium (DMEM; HyClone). HEK293T cells were maintained in  
29 Roswell Park Memorial Institute medium (RPMI; HyClone). Medium was supplemented with  
30 10% foetal bovine serum (FBS; PAN Biotech) at 37°C in a 5% CO<sub>2</sub> humidified atmosphere.  
31 SARS-CoV-2 (strain HB-01) was kindly provided by the National Virus Resource Center,  
32 Wuhan Institute of Virology, Chinese Academy of Sciences. The complete genome for this  
33 SARS-CoV-2 strain was submitted to GISAID (BetaCoV/Wuhan/IVDC-HB-01/2020|EPI-ISL-  
34 402119).

35

### 36 **Antibodies and Reagents**

37 Rabbit anti-LC3B (cat. no. 3868S) polyclonal antibodies (Abs), anti-Ribosomal protein L7a  
38 (cat. no. 2415S), anti-PA28 $\alpha$  (cat. no. 2408S) polyclonal antibodies (Abs) were purchased from  
39 Cell Signalling Technology. Rabbit anti-p62 (cat. no. PM045) polyclonal Abs and mouse anti-  
40 tubulin (cat. no. M175-3) monoclonal Abs were purchased from MBL. Rabbit anti-Calnexin  
41 (cat. no. C4731) polyclonal Abs and anti-TUFM polyclonal Abs were purchased from Sigma-  
42 Aldrich. Mouse anti-SARS-CoV-2 nucleocapsid antibody was purchased from Sino Biological  
43 (cat. no. 40143-MM05). Rabbit anti-TOM20 (cat. no. 11802-1-AP), anti-TIM23 (cat. no.  
44 11123-1-AP) polyclonal Abs and mouse anti-GFP tag (cat. no. 66002-1-Ig) monoclonal Abs  
45 were purchased from Proteintech. Mouse anti-Flag tag (cat. no. AE005) and anti-HA tag (cat.

46 no. AE008) monoclonal Abs were purchased from ABclonal Technology. Horseradish  
47 peroxidase (HRP)-conjugated anti-mouse (cat. no. AS003) and anti-rabbit (cat. no. AS014)  
48 secondary Abs were purchased from ABclonal Technology. CoraLite 594-conjugated goat anti-  
49 mouse (cat. no. SA00013-3) secondary Abs were purchased from Proteintech.  
50 Chloroquine (CQ) (cat. no. HY-17589A), 3-methyladenine (3-MA) (cat. no. HY-19312),  
51 Wortmannin (cat. no. HY-10197) and MG132 (cat. no. HY-13259) were purchased from  
52 MedChemExpress. Lipofectamine 2000 (cat. no. 11668) were purchased from Invitrogen.

53

#### 54 **SDS-PAGE and Western Blotting**

55 For the SDS-PAGE assay, protein samples were prepared by using cell lysis buffer for Western  
56 blotting and Immunoprecipitation (IP) (Beyotime) that contained an EDTA-free protease  
57 inhibitor cocktail (Bimake). After SDS-PAGE separation, proteins were transferred to  
58 nitrocellulose membranes (GE Healthcare). After blocking with 2% bovine serum albumin  
59 (BSA, Biofrox) in Phosphate Buffered Saline (PBS), the membranes were incubated with  
60 corresponding primary antibodies, followed by horseradish peroxidase-conjugated secondary  
61 antibodies.

62

#### 63 **Immunofluorescence Analysis**

64 Huh7.0/Vero-E6 cells were transfected with the indicated plasmids with Lipofectamine 2000  
65 (Invitrogen) according to the manufacturer's protocol. After transfection for 24 hours, Huh7.0  
66 cells were infected with SARS-CoV-2 at a MOI of 1, and Vero-E6 cells were infected with  
67 SARS-CoV-2 at a MOI of 0.05 for 24 or 48 hours. For immunofluorescence analysis, the cells

68 to be tested were fixed with 4% paraformaldehyde (PFA) at room temperature for 30 min and  
69 treated with 0.1% (vol/vol) Triton X-100 for 10 min. The cells were incubated in 2% (vol/vol)  
70 BSA for 1 hour at room temperature. Then, the cells were incubated with the designated primary  
71 antibody for 2 hours and then with the appropriate Alexa Fluor-conjugated secondary antibody  
72 for 1 hour. Finally, DAPI staining was used to visualize DNA according to the purpose of the  
73 experiment. The cells were then observed with a ZEISS confocal microscope under a 60 × oil  
74 objective.

75

### 76 **In Vivo Coimmunoprecipitation**

77 Huh7.0 cells were transfected with the appropriate plasmids with Lipofectamine 2000  
78 according to the manufacturer's protocol, and 36 hours later, cells were harvested and lysed  
79 with lysis buffer (50 mM Tris-HCl [pH 7.4], 150 mM NaCl, 1% [wt/vol] Triton X-100, 1 mM  
80 EDTA [pH 8.0], 0.1% [vol/vol] sodium dodecyl sulfate [SDS], and protease inhibitor cocktail)  
81 for 30 min at 4°C. The supernatants were collected by centrifugation at 13,000 rpm for 30 min  
82 at 4°C and precleared by incubation with protein G Sepharose 4 Fast Flow beads for 1 hour at  
83 4°C with rotation. The supernatants were collected via centrifugation at 3,000 rpm for 2 min at  
84 4°C, and specific primary antibodies were added and incubated overnight at 4°C with rotation.  
85 The beads were collected via centrifugation at 3,000 rpm for 2 min at 4°C and washed three  
86 times with 1 mL lysis buffer. Then, the collected beads were boiled at 100°C for 5 min in 50 µL  
87 2 × SDS protein-loading buffer and analysed via Western blot.

88

### 89 **Transmission Electron Microscopy**

90 Vero-E6 cells were infected with SARS-CoV-2 for 24 hours at a MOI of 0.05 or treated with  
91 CQ (50 mM) for 6 hours. Then, the cells were fixed with 2.5% glutaraldehyde for 2 hours at  
92 room temperature. The cells were harvested and fixed with 2.5% glutaraldehyde on ice for 2  
93 hours followed by fixation in 2% osmium tetroxide, and then, the cells were dehydrated with  
94 sequential washes in 50%, 70%, 90%, 95%, and 100% ethanol. Areas containing cells were  
95 block-mounted and thinly sliced.

96

### 97 **Autophagy Analysis**

98 For analyses involving CQ (50 mM), Huh7.0/Vero-E6 cells were treated for 6 hours before  
99 further experiments. For analyses involving 3-MA (5 mM) and Wortmannin (10  $\mu$ M), Huh7.0  
100 cells were treated for 4 hours and treated again after absorption of SARS-CoV-2 until the  
101 samples were harvested. For analyses involving only 3-MA (1 mM), Vero-E6 cells were treated  
102 for 4 hours and treated again after absorption of SARS-CoV-2 until the samples were harvested.

103

### 104 **Virus Plaque Assay**

105 Huh7.0 cells or Caco-2 cells pretreated with 3-MA, Wortmannin were infected by SARS-CoV-  
106 2 for 1 hour at a MOI of 1, and then, the medium was replaced with the same medium as that  
107 was used for the pretreatment. Additionally, Vero-E6 cells pretreated with 3-MA or Wortmannin  
108 were infected with SARS-CoV-2 for 1 hour at a MOI of 0.05, and then, the medium was  
109 replaced with the same medium as that used for the pretreatment. The supernatants were  
110 obtained at 24 hours after infection for the virus plaque assay. Briefly, the sample to be tested  
111 was diluted in basal DMEM, and confluent Vero cells in 12-well plates were inoculated with

112 the samples and incubated at 37°C for 1 hour. The cells were washed twice with PBS (HyClone)  
113 to remove unbound virus. Subsequently, the cells were covered with 1 mL of 4% sodium  
114 carboxymethyl cellulose (containing 3% FBS) per well. After culturing for 72 hours, when the  
115 cells showed lesions or plaques, each well was filled with 10% neutral formaldehyde and fixed  
116 for more than 4 hours. Finally, plaques were stained with 0.1% crystal violet and counted.

117

### 118 **Subcellular Fractionation**

119 Subcellular fractionation assays were performed as previously described <sup>1</sup>. Briefly, Huh7.0 cells  
120 were transfected with the indicated plasmids, and 36 hours later, cells were harvested and  
121 resuspended in 300 mL mitochondria isolation buffer (10 mM Tris-HCl [pH 7.4], 2 mM MgCl<sub>2</sub>,  
122 10 mM KCl, and 250 mM sucrose) and homogenized with a Dounce tissue grinder for 20 min  
123 at 4°C. The supernatants were collected after centrifugation at 500 g for 10 min at 4°C and then  
124 centrifuged for another 5,000 g for 10 min to yield the cytosolic fraction. Precipitates were  
125 resuspended in 1 mL mitochondria extraction buffer and collected after centrifugation at 5,000  
126 g for 10 min at 4°C to yield the mitochondrial fraction. Equivalent amounts of protein from  
127 each fraction were analysed by Western blot with the indicated antibodies.

128

### 129 **Reporter Assays**

130 HEK293T cells cultured in 12-well plates were transfected with a control plasmid or plasmids  
131 expressing RIG-I-N, MAVS, TBK1, IKK $\epsilon$ , or IRF3-5D, along with IFN- $\beta$  luciferase reporter  
132 plasmids or plasmids expressing viral proteins. After 24 hours of transfection, cells were  
133 harvested, and cell lysates were used to measure luciferase levels using a Dual Luciferase

134 Reporter Assay System (Promega). In addition, Sendai virus was used as a positive stimulus.

135

### 136 **Flow Cytometric Analyses**

137 Mitochondria-associated ROS levels were measured by staining cells with MitoSOX  
138 (Invitrogen) at 2.5  $\mu$ M for 30 min at 37 °C. Mitochondria membrane potential was measured  
139 using the kit from Invitrogen and performed according to the manufacturer's instructions. Cells  
140 were then washed with PBS solution and re-suspended in cold PBS solution for FACS analysis.

141

### 142 **Statistical Analysis**

143 Data are expressed as the means  $\pm$  standard errors of the means (SEMs). Statistical analysis was  
144 performed by Student's t test using GraphPad Prism software (version 5.0). A P value equal to  
145 or lower than 0.05 was considered significant.

146

### 147 **Abbreviation**

148 SARS-CoV-2: Severe Acute Respiratory Syndrome Coronavirus 2; CQ: chloroquine; 3-MA: 3-  
149 methyladenine; ATG: autophagy related; p62: sequestosome 1; LC3: microtubule-associated  
150 proteins light chain 3; TIM23: mitochondrial import inner membrane translocase subunit;  
151 TOM20: mitochondrial 20 kDa outer membrane protein; PA28: proteasome activator 28 subunit;  
152 L7a: 60S ribosomal protein L7a. RFP-LC3: LC3 fused to red fluorescent protein (gene); GFP-  
153 LC3: LC3 fused to green fluorescent protein (gene); BID: BH3-interacting domain death  
154 agonist; WT: wild type; SeV: sendai virus; IFN: interferon; RIG-I: antiviral innate immune  
155 response receptor; MAVS: mitochondrial antiviral-signaling protein; TBK1: serine/threonine-

156 protein kinase; IKK $\epsilon$ : inhibitor- $\kappa$ b kinase  $\epsilon$ ; IRF3-5D: interferon regulatory factor 3 mutant;  
157 TUFM: Tu translation elongation factor mitochondrial; MOI: multiplicity of infection; hpi:  
158 hours post-infection; hpt: hours post-transfection.

159

## 160 **References**

161 1 Ding, B. *et al.* The Matrix Protein of Human Parainfluenza Virus Type 3 Induces Mitophagy that  
162 Suppresses Interferon Responses. *Cell Host Microbe* **21**, 538-547 e534, doi:10.1016/j.chom.2017.03.004  
163 (2017).

164

165

166

167

168

169

170

171

172

173

174

175

176

177

178

179



180 **Supplementary Figures**

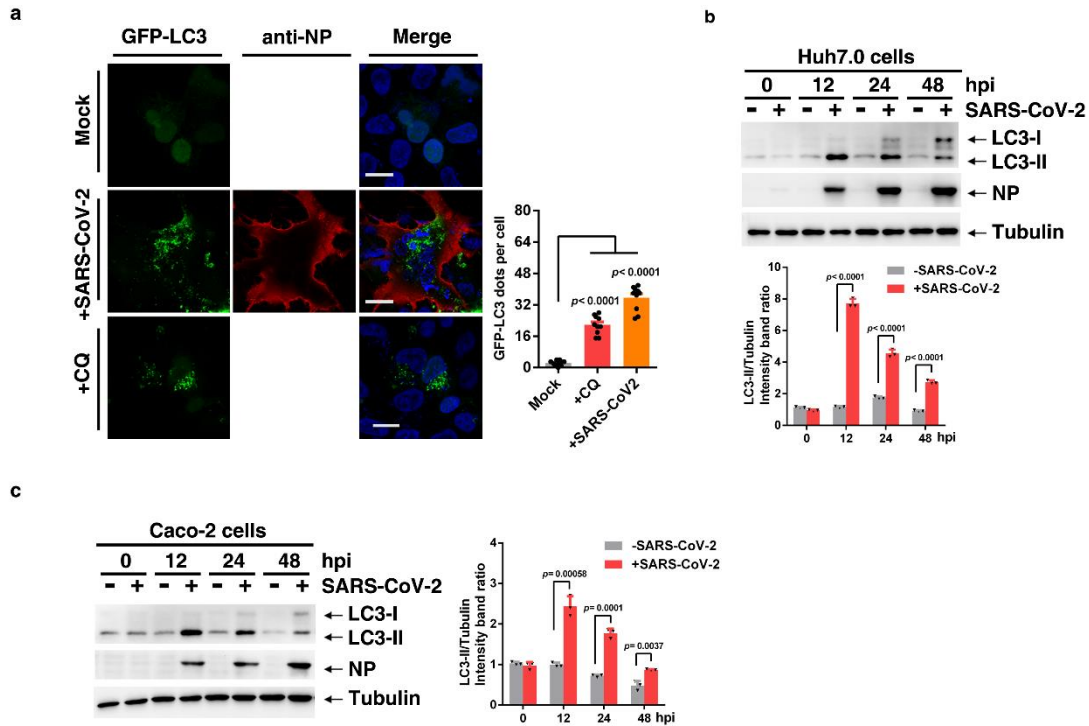

181  
 182 **Fig. S1** SARS-CoV-2 infection triggers autophagy in vitro. **a** GFP-LC3 dot formation in  
 183 Huh7.0 cells transiently transfected with GFP-LC3 and either left uninfected (Mock) or infected  
 184 with SARS-CoV-2 (MOI of 1) for 48 hours or treated with CQ for 4 hours. Scale bar, 10  $\mu$ m. **b**  
 185 Huh7.0 cells were uninfected (-) or infected (+) with SARS-CoV-2. Lysates were evaluated by  
 186 Western blotting (WB). **c** Caco-2 cells were uninfected (-) or infected (+) with SARS-CoV-2.  
 187 Lysates were evaluated by Western blotting (WB). Three independent experiments with three  
 188 technical repetitions were performed. Data are expressed as mean  $\pm$  SEM (error bars). Statistical  
 189 analyses used Student's t test.  $P < 0.05$  was considered statistically significant.

190  
 191  
 192  
 193  
 194  
 195  
 196  
 197

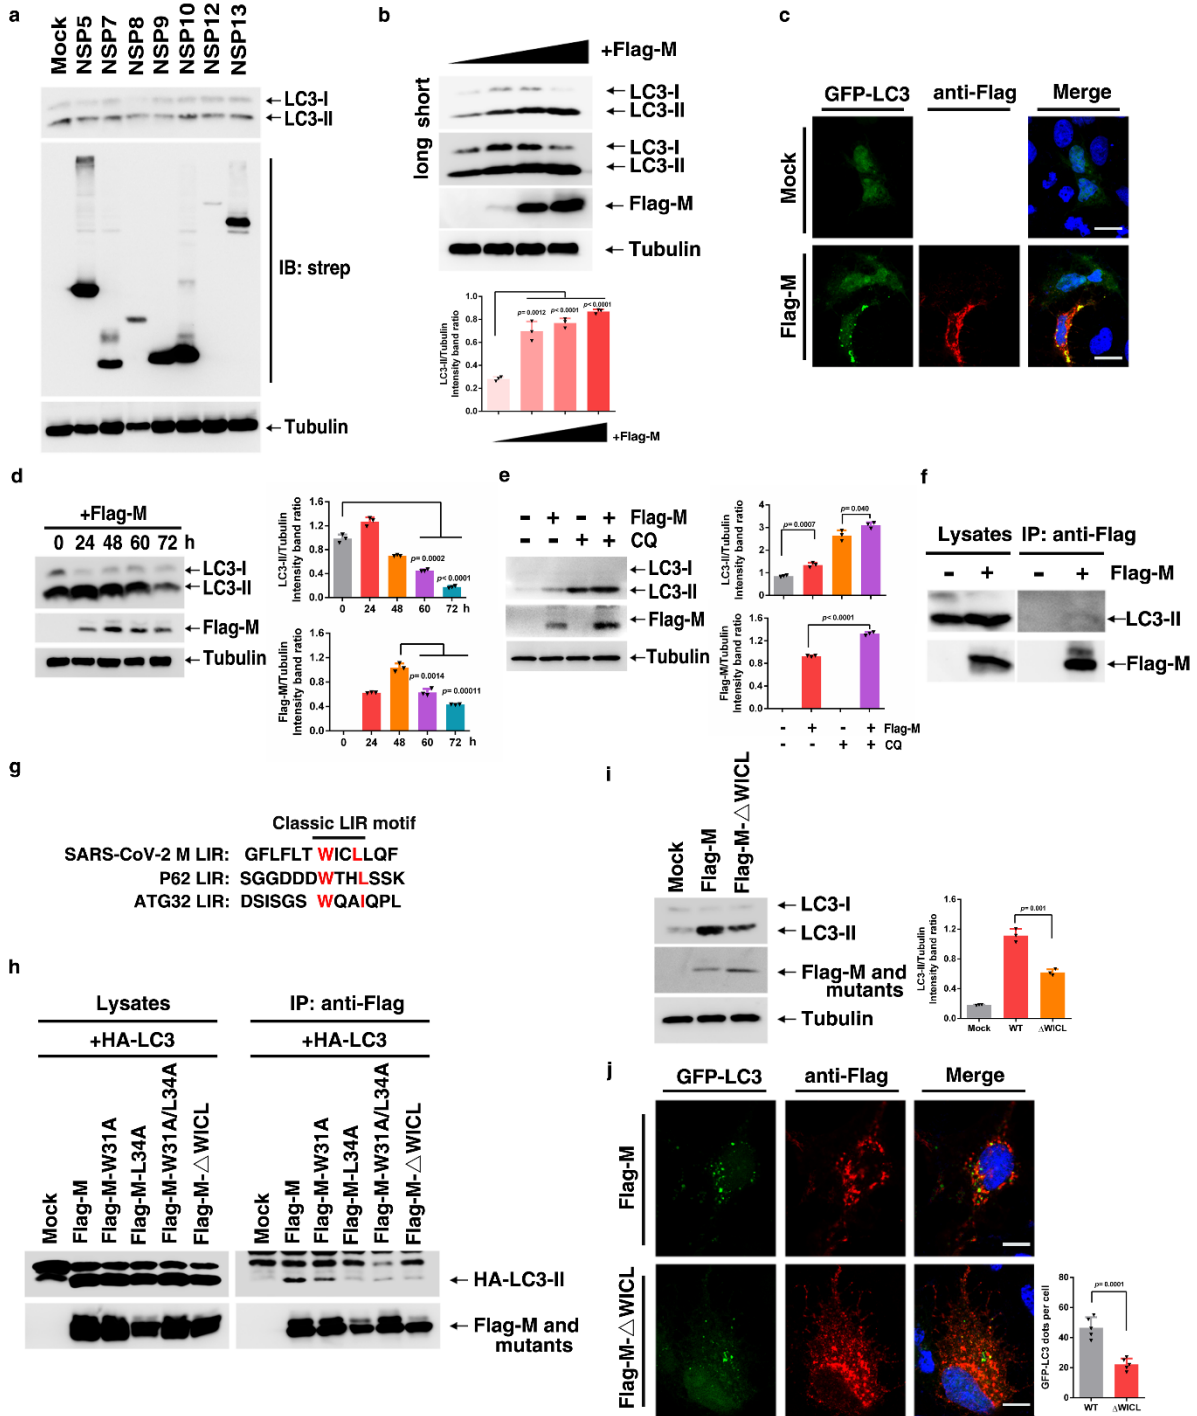

198

199 **Fig. S2** SARS-CoV-2 M induces autophagy and interact with LC3. **a** Huh7.0 cells were  
 200 transfected with the indicated plasmids. Lysates were analysed by immunoblotting. **b** Huh7.0  
 201 cells were transfected with the indicated plasmids and analysed for the colocalization of Flag-  
 202 M and GFP-LC3. **c** Huh7.0 cells were transfected with different concentrations of Flag-M  
 203 plasmid (0  $\mu$ g, 0.3  $\mu$ g, 1  $\mu$ g and 2  $\mu$ g). Lysates were analysed by immunoblotting. **d** HEK293T

204 cells were transfected with Flag-M plasmid and collected at different times. Lysates were  
205 analysed by immunoblotting. **e** Huh7.0 cells were transfected with Flag-M and treated with CQ.  
206 Lysates were analysed by immunoblotting. **f** Interaction between Flag-M and endogenous LC3  
207 in Huh7.0 cells. **g** Typical LIR sequences in SARS-CoV-2-M. **h** Interaction between HA-LC3  
208 and wild-type M and mutants. **i** Huh7.0 cells were transfected with the indicated plasmids and  
209 analysed by immunoblotting. **j** Huh7.0 cells were transfected with Flag-M plasmid and mutant  
210 plasmids and analysed for GFP-LC3 dots. Scale bar, 10  $\mu$ m. Three independent experiments  
211 with three technical repetitions were performed. Data are expressed as mean  $\pm$  SEM (error bars).  
212 Statistical analyses used Student's t test.  $P < 0.05$  was considered statistically significant.

213

214

215

216

217

218

219

220

221

222

223

224

225

226

227

228

229

230

231

232

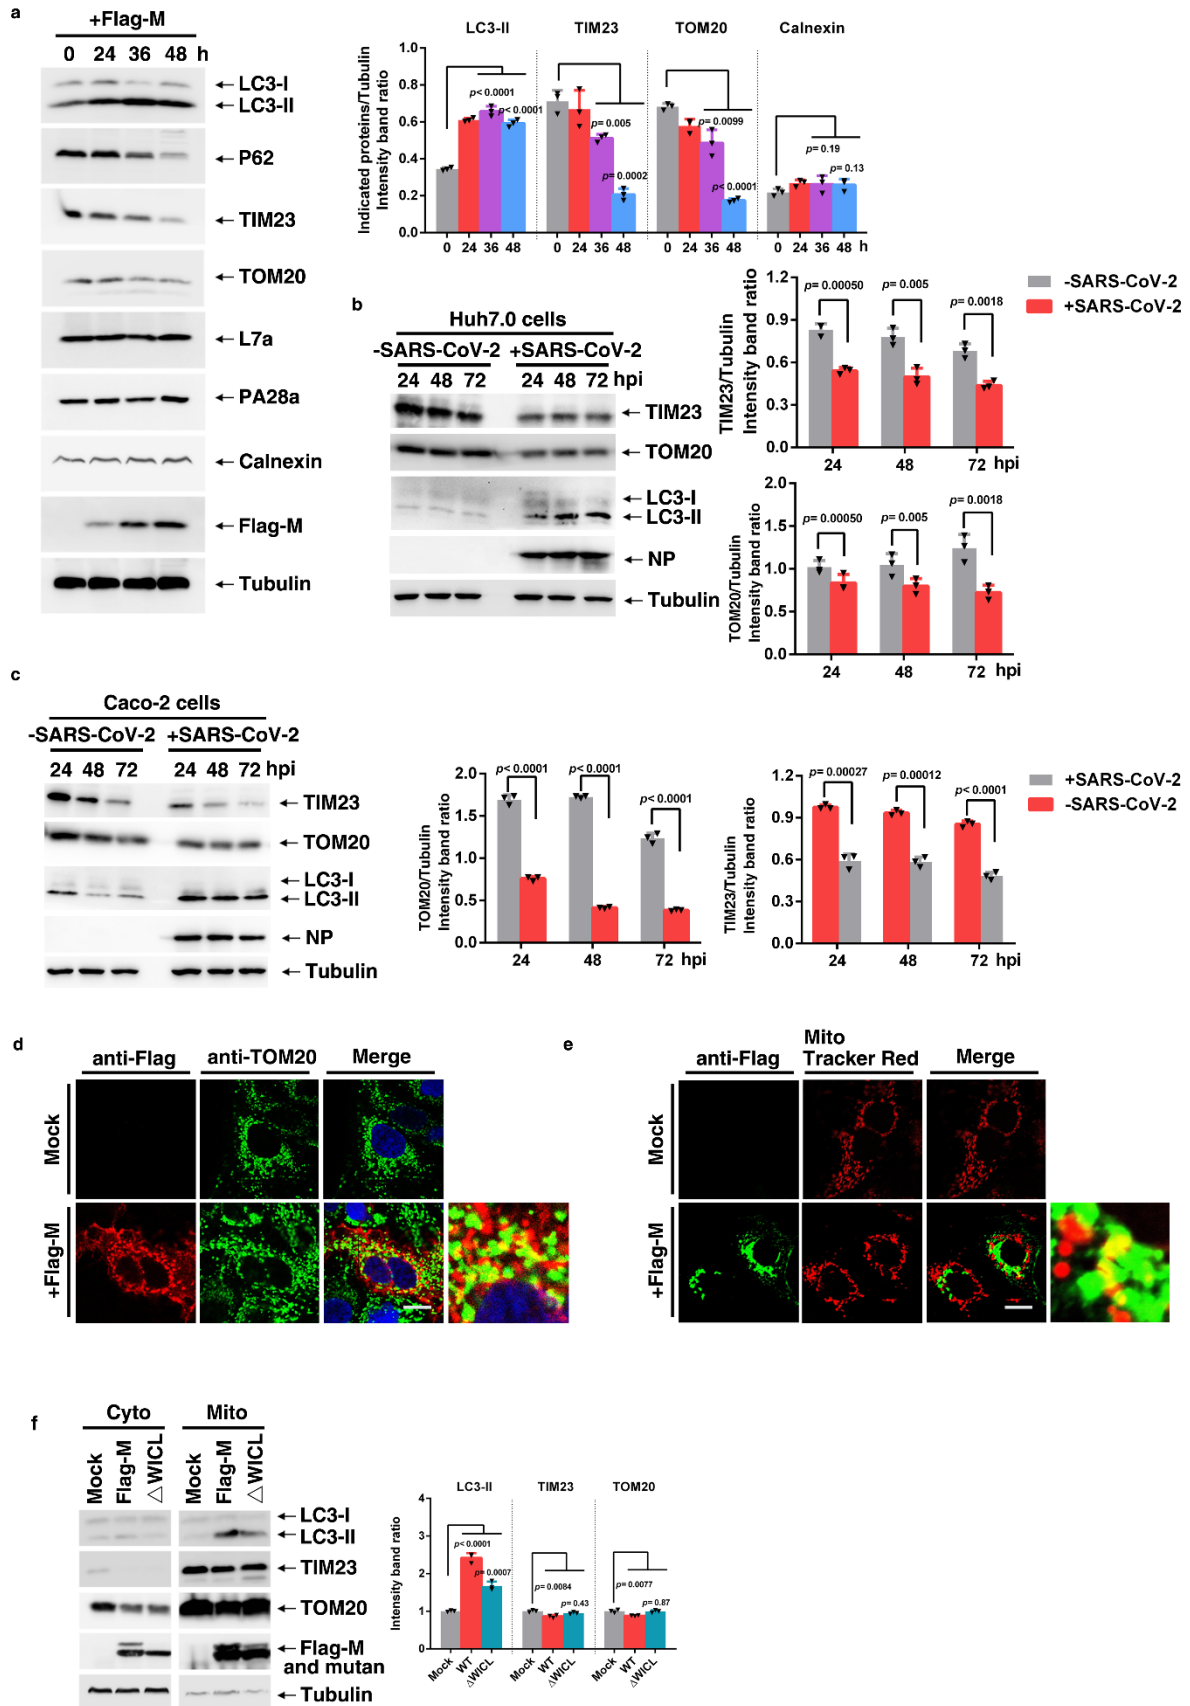

233

234 **Fig. S3** SARS-CoV-2 and M induces selective mitochondrial autophagy. **a** Huh7.0 cells were

235 transfected with Flag-M plasmid and collected at different times. Lysates were analysed by  
236 immunoblotting. **b** Huh7.0 cells were uninfected (-) or infected (+) SARS-CoV-2. Lysates were  
237 collected at different times and analysed by immunoblotting. **c** Caco-2 cells were uninfected (-)  
238 or infected (+) SARS-CoV-2. Lysates were collected at different times and analysed by  
239 immunoblotting. **d** Huh7.0 cells were transfected with Flag-M plasmid plasmids and analysed  
240 for the colocalization of Flag-M and TOM20 (mitochondrial 20 kDa outer membrane protein).  
241 Scale bar, 10  $\mu$ m. **e** Huh7.0 cells were transfected with Flag-M plasmid plasmids and analysed  
242 for the colocalization of Flag-M and mitochondria labeled with probes. Scale bar, 10  $\mu$ m. **f**  
243 Huh7.0 cells were transfected with the indicated plasmids, and mitochondrial fractions were  
244 isolated via ultracentrifugation. Cytoplasm (Cyto) and mitochondria (Mito) were analysed by  
245 immunoblotting. Three independent experiments with three technical repetitions were  
246 performed. Data are expressed as mean  $\pm$  SEM (error bars). Statistical analyses used  
247 Student's t test.  $P < 0.05$  was considered statistically significant.

248

249

250

251

252

253

254

255

256

257

258

259

260

261

262

263

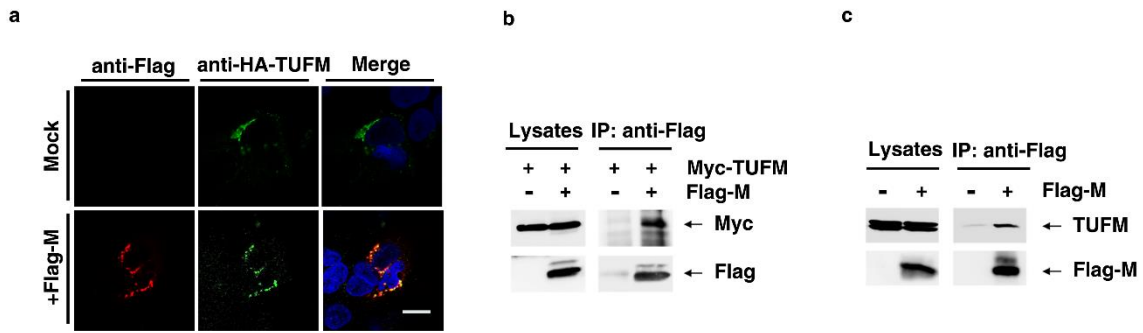

264

265 **Fig. S4** SARS-CoV-2 M interact with TUFM (Tu translation elongation factor mitochondrial).

266 **a** Huh7.0 cells were transfected with Flag-M plasmid plasmids and HA-TUFM plasmid,

267 analysed for the colocalization of Flag-M and HA-TUFM. Scale bar, 10  $\mu$ m. **b** Interaction

268 between Flag-M and Myc-TUFM. **c** Interaction between Flag-M and endogenous TUFM in

269 Huh7.0 cells. Three independent experiments with three technical repetitions were performed.

270

271

272

273

274

275

276

277

278

279

280

281

282

283

284

285

286

287

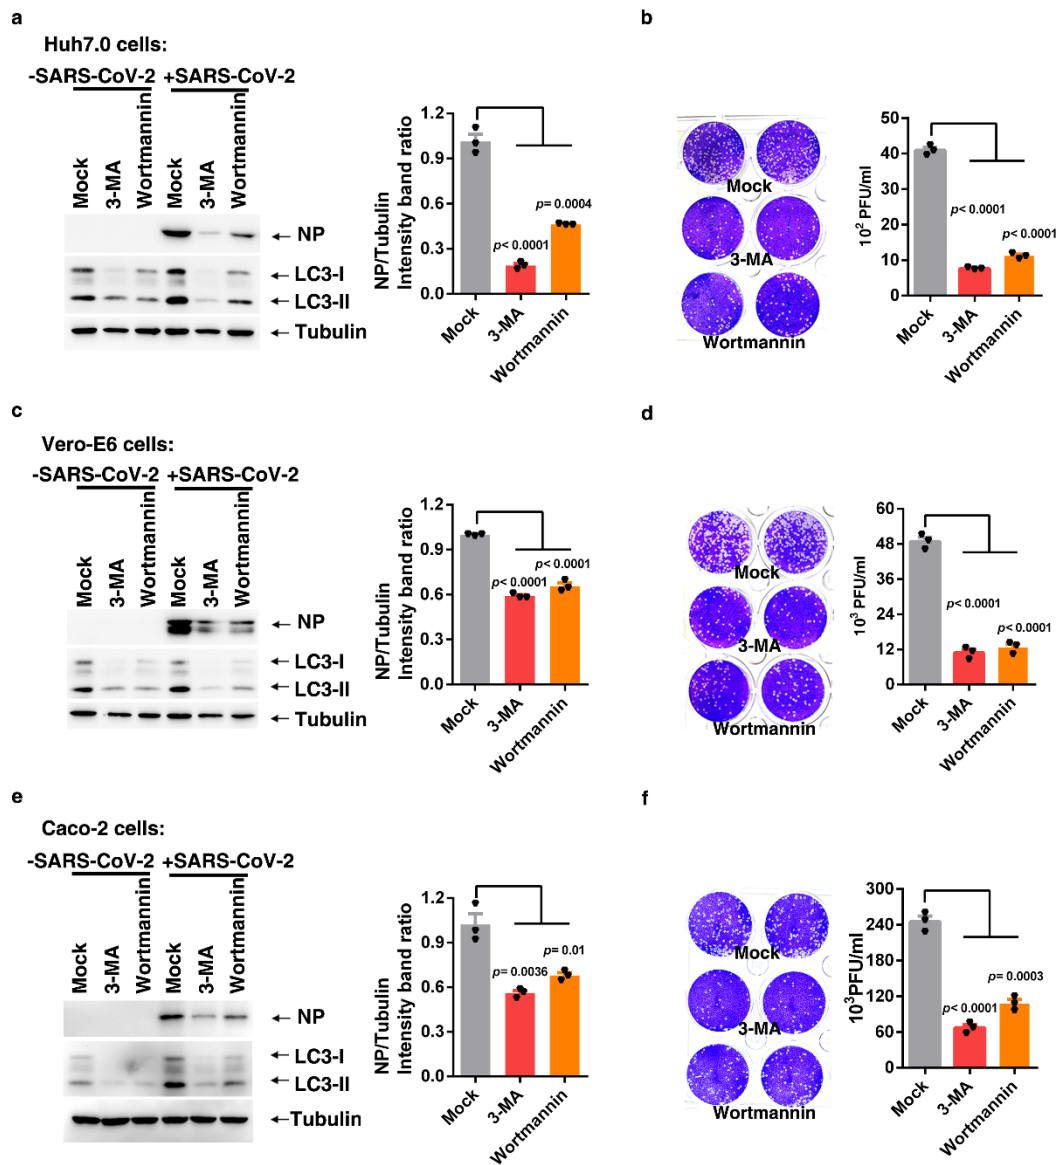

288

289 **Fig. S5** Blocking autophagy with two pharmaceutical inhibitors (3-MA and Wortmannin)  
 290 significantly suppresses SARS-CoV-2 infection. **a** Huh7.0 cells were untreated (Mock) or  
 291 treated with 3-MA/Wortmannin and then uninfected (-) or infected (+) with SARS-CoV-2  
 292 (MOI of 1) for 24 hours. Lysates were evaluated by WB. **b** Huh7.0 cells were untreated (Mock)  
 293 or treated with 3-MA/Wortmannin and then uninfected (-) or infected (+) with SARS-CoV-2  
 294 (MOI of 1) for 24 hours. Extracellular viral yields were evaluated by virus plaque assay. **c** Vero-  
 295 E6 cells were untreated (Mock) or treated with 3-MA/Wortmannin and then uninfected (-) or  
 296 infected (+) with SARS-CoV-2 (MOI of 0.05) for 24 hours. Lysates were evaluated by WB. **d**  
 297 Vero-E6 cells were untreated (Mock) or treated with 3-MA/Wortmannin and then uninfected

298 (-) or infected (+) with SARS-CoV-2 (MOI of 0.05) for 24 hours. Extracellular viral yields were  
299 evaluated by virus plaque assay. **e** Caco-2 cells were untreated (Mock) or treated with 3-  
300 MA/Wortmannin and then uninfected (-) or infected (+) with SARS-CoV-2 (MOI of 1) for 24  
301 hours. Lysates were evaluated by WB. **f** Caco-2 cells were untreated (Mock) or treated with 3-  
302 MA/Wortmannin and then uninfected (-) or infected (+) with SARS-CoV-2 (MOI of 1) for 24  
303 hours. Extracellular viral yields were evaluated by virus plaque assay. Three independent  
304 experiments with three technical repetitions were performed. Data are expressed as  
305 mean  $\pm$  SEM (error bars). Statistical analyses used Student's t test.  $P < 0.05$  was considered  
306 statistically significant.

307

308

309

310

311

312

313

314

315

316

317

318

319

320

321

322

323

324

325

326



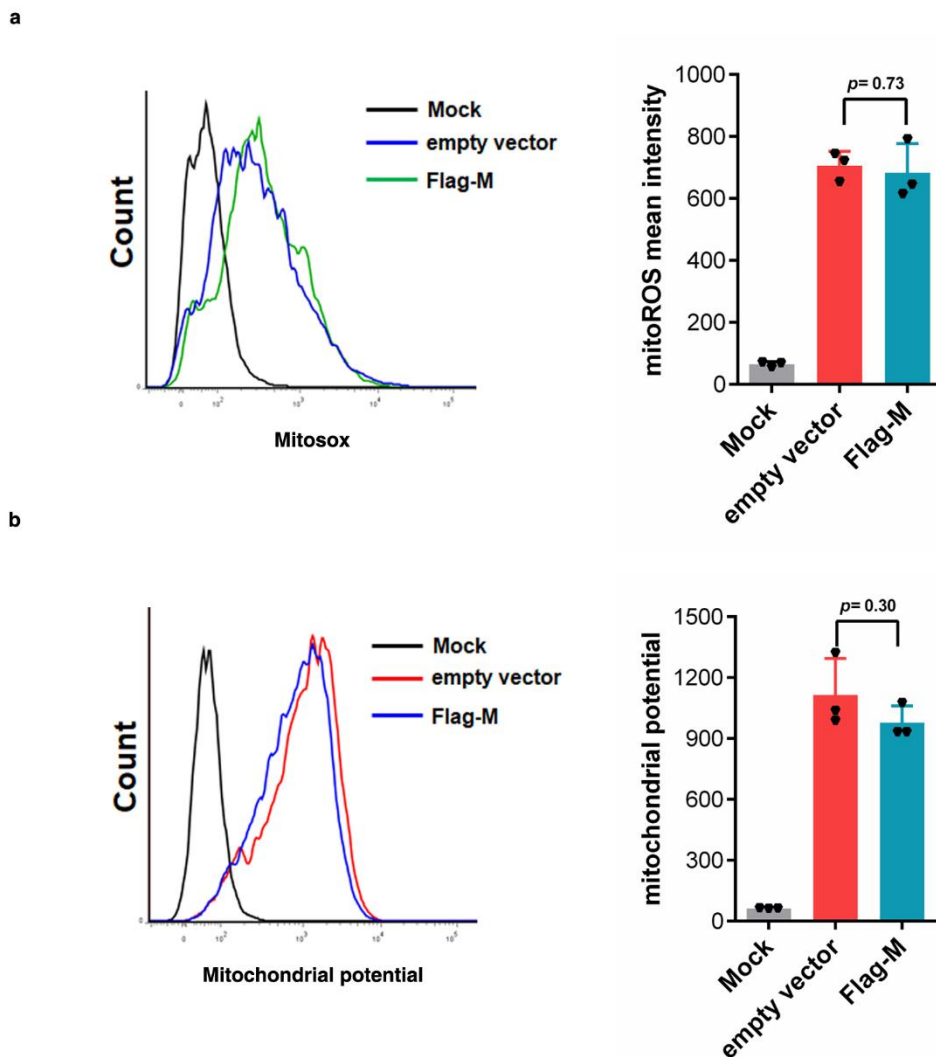

327

328 **Fig. S6** Detection of superoxide in live cells using MitoSOX™ Red superoxide indicator and  
 329 detection of mitochondrial membrane potential using MitoProbe TMRM. **a** Huh7.0 cells were  
 330 transfected with Flag-M plasmid and cells were subsequently stained with MitoProbe TMRM  
 331 and analyzed on an Attune NxT Flow Cytometer using a 561 nm laser for excitation and 585  
 332 nm/16BP filter for emission. **b** Huh7.0 cells were transfected with Flag-M plasmid and cells  
 333 were subsequently stained with MitoSOX™ Red superoxide indicator and analyzed on an  
 334 Attune NxT Flow Cytometer using a 561 nm laser for excitation and 585 nm/16BP filter for  
 335 emission. Three independent experiments with three technical repetitions were performed. Data  
 336 are expressed as mean  $\pm$  SEM (error bars). Statistical analyses used Student's *t* test.  $P < 0.05$   
 337 was considered statistically significant.
